# Supplementary material
Source: Springer Nature journal article supplement (https://www.springermedizin.de/resource/supplementary/12889_2014_7145_MOESM3_ESM.pdf/9496912)
Supplement: MOESM3 [file 9496912]

|                                                                       | Number <sup>1</sup> |
|-----------------------------------------------------------------------|---------------------|
| Number                                                                | 1470                |
| Median age (days) at the time of the interview (Inter quartile range) | 56 (24-111)         |
| Reported to have sought vaccination <sup>2</sup>                      | 229 (16%)           |
| Recalled being told to return another day                             | 135 (59%)           |
| Received other vaccinations                                           | 76 (33%)            |
| Reported not to have sought vaccination <sup>3</sup>                  | 1239 (84%)          |
| Received other vaccinations                                           | 39 (3%)             |
| Knew the child was due to be vaccinated                               | 1123 (91%)          |
| Lack of money                                                         | 760 (61%)           |
| Distance to vaccination place too long                                | 481 (39%)           |
| Waiting for outreach services in the village.                         | 396 (32%)           |

---

<sup>1</sup> Number (%) unless reported otherwise

<sup>2</sup> Children can be included in more than one category

<sup>3</sup> Mothers can report several reasons not having sought vaccination
